# Supplementary material
Source: HighWire-hosted journal article supplement (https://www.cmaj.ca/highwire/filestream/149253/field_highwire_adjunct_files/0/221732-res-1-at.pdf)
Supplement: 221732-res-1-at.pdf [file 221732-res-1-at.pdf]

## Supplementary Appendix 1

|            |                                                                |        |
|------------|----------------------------------------------------------------|--------|
| Section S1 | Antimicrobial prescribing modelling equations and definitions  | Page 2 |
| Section S2 | Modified Antibacterial Spectrum Score values                   | Page 3 |
| Section S3 | Bootstrapping Methodology for confidence interval calculations | Page 4 |

## Section S1: Calculations and Definitions for Prescribing Metrics

- DOT per 100 days was modeled using negative binomial regression with encounter-level Days of Therapy as outcome, and length of stay as an offset.

$$DOT_{ij} = \frac{\sum_{k=1}^k DaysOfTherapy_{ij}}{\sum_{k=1}^k PatientDays_{ij}} * 100$$

- AFD per 100 days was modeled using negative binomial regression with encounter-level Antimicrobial Free Days as outcome, and length of stay as an offset.

$$AFD_{ij} = \frac{\sum_{k=1}^k AntimicrobialFreeDays_{ij}}{\sum_{k=1}^k PatientDays_{ij}} * 100$$

- Spectrum Score was modeled using negative binomial regression with encounter-level  $\sum(DOT_x * SpectrumScore_x)$  as outcome, and DOT as an offset.

$$SpecScore_{ij} = \frac{\sum_{k=1}^k \sum DOT_{drug_z} * SpecScore_{drug_z}}{\sum_{k=1}^k DOT_{ij}}$$

## Section S2: Modified Antibacterial Spectrum Score calculation values(1, 2)

| Drug Class                    | modified Antibacterial Spectrum Score |
|-------------------------------|---------------------------------------|
| Amikacin                      | 35.5                                  |
| Amoxicillin                   | 13.5                                  |
| Amoxicillin-Clavulanate       | 29.5                                  |
| Ampicillin                    | 13.5                                  |
| Azithromycin                  | 12.25                                 |
| Cefadroxil                    | 19.25                                 |
| Cefazolin                     | 19.25                                 |
| Cefixime                      | 25.25                                 |
| Ceftazidime                   | 33.25                                 |
| Ceftriaxone                   | 25.25                                 |
| Cephalexin                    | 19.25                                 |
| Ciprofloxacin                 | 39.75                                 |
| Clarithromycin                | 12.25                                 |
| Clindamycin                   | 10.75                                 |
| Cloxacillin                   | 4.25                                  |
| Daptomycin                    | 14.25                                 |
| Doxycycline                   | 38.75                                 |
| Ertapenem                     | 30.25                                 |
| Erythromycin                  | 12.25                                 |
| Gentamicin                    | 35.5                                  |
| Levofloxacin                  | 39.75                                 |
| Linezolid                     | 18                                    |
| Meropenem                     | 41.5                                  |
| Metronidazole                 | 4                                     |
| Minocycline                   | 38.75                                 |
| Moxifloxacin                  | 36.25                                 |
| Nitrofurantoin                | 10                                    |
| Penicillin                    | 4                                     |
| Piperacillin-tazobactam       | 42.25                                 |
| Sulfamethoxazole-trimethoprim | 33.5                                  |
| Tetracycline                  | 38.75                                 |
| Tigecycline                   | 49.75                                 |
| Tobramycin                    | 35.5                                  |
| Vancomycin IV                 | 13                                    |
| Vancomycin PO                 | 13                                    |
| Vancomycin PR                 | 13                                    |

## Section S3

### Bootstrapping Methodology for Confidence Interval Calculation of Physician Variability

For each physician at each hospital, 1000 random samples of size  $n$  were drawn from the encounters attributed to that physician without replacement, where  $n$  represents the total number of encounters attributed to that physician. For each random sample, antimicrobial prescribing measures were calculated as detailed above. The 2.5<sup>th</sup> and 97.5<sup>th</sup> percentiles of the 1000 sampled estimates provided the 95% confidence intervals.

## References

1. Madaras-Kelly K, Jones M, Remington R, Hill N, Huttner B, Samore M. Development of an antibiotic spectrum score based on veterans affairs culture and susceptibility data for the purpose of measuring antibiotic de-escalation: a modified Delphi approach. *Infect Control Hosp Epidemiol*. 2014;35(9):1103-13.
2. McIntyre MT, Naik L, Bell CM, Morris AM. Development and Assessment of a Physician-Specific Antimicrobial Usage and Spectrum Feedback Tool. *Open Forum Infect Dis*. 2017;4(3):ofx124.
